# Supplementary material
Source: Springer Nature journal article supplement (https://www.springermedizin.de/resource/supplementary/12916_2013_981_MOESM14_ESM.pdf/9598756)
Supplement: MOESM14 [file 9598756]

**Supplementary Table 13:** Infinium HumanMethylation450K BeadChip array probes with possible cross reactivity to other locations in the genome.

| Probe ID   | Numbers of cross reactive targets with matching base pairs: |       |       |       |
|------------|-------------------------------------------------------------|-------|-------|-------|
|            | 47 bp                                                       | 48 bp | 49 bp | 50 bp |
| cg02738374 | 1                                                           | 0     | 0     | 0     |
| cg04031454 | 24                                                          | 1     | 0     | 0     |
| cg05903046 | 2                                                           | 0     | 0     | 0     |
| cg07106501 | 223                                                         | 6     | 0     | 0     |
| cg08036804 | 546                                                         | 59    | 1     | 0     |
| cg10278506 | 6                                                           | 0     | 0     | 0     |
| cg11773920 | 0                                                           | 0     | 1     | 0     |
| cg12224879 | 0                                                           | 1     | 0     | 0     |
| cg12992040 | 1                                                           | 0     | 0     | 0     |
| cg14727106 | 132                                                         | 12    | 0     | 0     |
| cg20284982 | 39                                                          | 3     | 0     | 0     |
| cg21577639 | 19                                                          | 2     | 0     | 0     |
| cg24002907 | 68                                                          | 24    | 7     | 0     |
